# Supplementary material
Source: Springer Nature journal article supplement (https://www.springermedizin.de/resource/supplementary/12958_2011_927_MOESM3_ESM.pdf/9568834)
Supplement: MOESM3 [file 9568834]

## Childhood

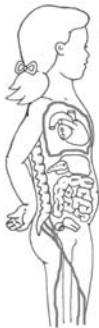

Schizophrenia

Asthma

Type I  
diabetes

Rickets

## Pregnancy

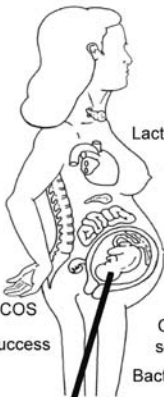

Lactation

Gestational  
diabetes

Preeclampsia

Spontaneous  
preterm birth

Caesarean  
section rate

Bacterial vaginosis

PCOS  
IVF success

Birth weight ↓  
Infant size ↓  
Bone development  
Bone health

## Adulthood

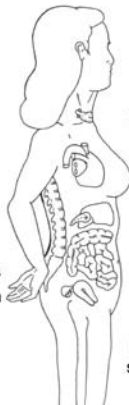

Hypertension

Cardiovascular  
disease

Type II  
diabetes

Obesity

Cancer

Multiple  
sclerosis

## Seniority

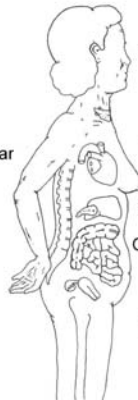

Cognitive  
impairment

Proximal  
myopathy

Osteoporosis

Osteomalacia

Falls

Fractures
